# Supplementary material for: A Sterol and Spiroditerpenoids from a Penicillium sp. Isolated from a Deep Sea Sediment Sample
Source: MDPI journal article supplement (doi:10.3390/md10020497), 2012-02-20

## Supplementary Materials

| Contents                                                                                                   | Page |
|------------------------------------------------------------------------------------------------------------|------|
| 1) <b>Figure S1.</b> $^1\text{H}$ NMR spectrum of sterolic acid ( <b>1</b> ; 500 MHz, $\text{CDCl}_3$ )    | 2    |
| 2) <b>Figure S2.</b> $^{13}\text{C}$ NMR spectrum of sterolic acid ( <b>1</b> ; 100 MHz, $\text{CDCl}_3$ ) | 3    |
| 3) <b>Figure S3.</b> $^1\text{H}$ NMR spectrum of brevione I ( <b>2</b> ; 500 MHz, acetone- $d_6$ )        | 4    |
| 4) <b>Figure S4.</b> $^{13}\text{C}$ NMR spectrum of brevione I ( <b>2</b> ; 100 MHz, acetone- $d_6$ )     | 5    |
| 5) <b>Figure S5.</b> NOESY spectrum of brevione I ( <b>2</b> ; 600 MHz, acetone- $d_6$ )                   | 6    |
| 6) <b>Figure S6.</b> $^1\text{H}$ NMR spectrum of brevione J ( <b>3</b> ; 500 MHz, acetone- $d_6$ )        | 7    |
| 7) <b>Figure S7.</b> $^{13}\text{C}$ NMR spectrum of brevione J ( <b>3</b> ; 100 MHz, acetone- $d_6$ )     | 8    |
| 8) <b>Figure S8.</b> NOESY spectrum of brevione J ( <b>3</b> ; 600 MHz, acetone- $d_6$ )                   | 9    |
| 9) <b>Figure S9.</b> $^1\text{H}$ NMR spectrum of brevione K ( <b>4</b> ; 500 MHz, acetone- $d_6$ )        | 10   |
| 10) <b>Figure S10.</b> $^{13}\text{C}$ NMR spectrum of brevione K ( <b>4</b> ; 150 MHz, acetone- $d_6$ )   | 11   |
| 11) <b>Figure S11.</b> NOESY spectrum of brevione K ( <b>4</b> ; 600 MHz, acetone- $d_6$ )                 | 12   |

**Figure S1.**  $^1\text{H}$  NMR Spectrum of Sterolic Acid (**1**; 500 MHz,  $\text{CDCl}_3$ )

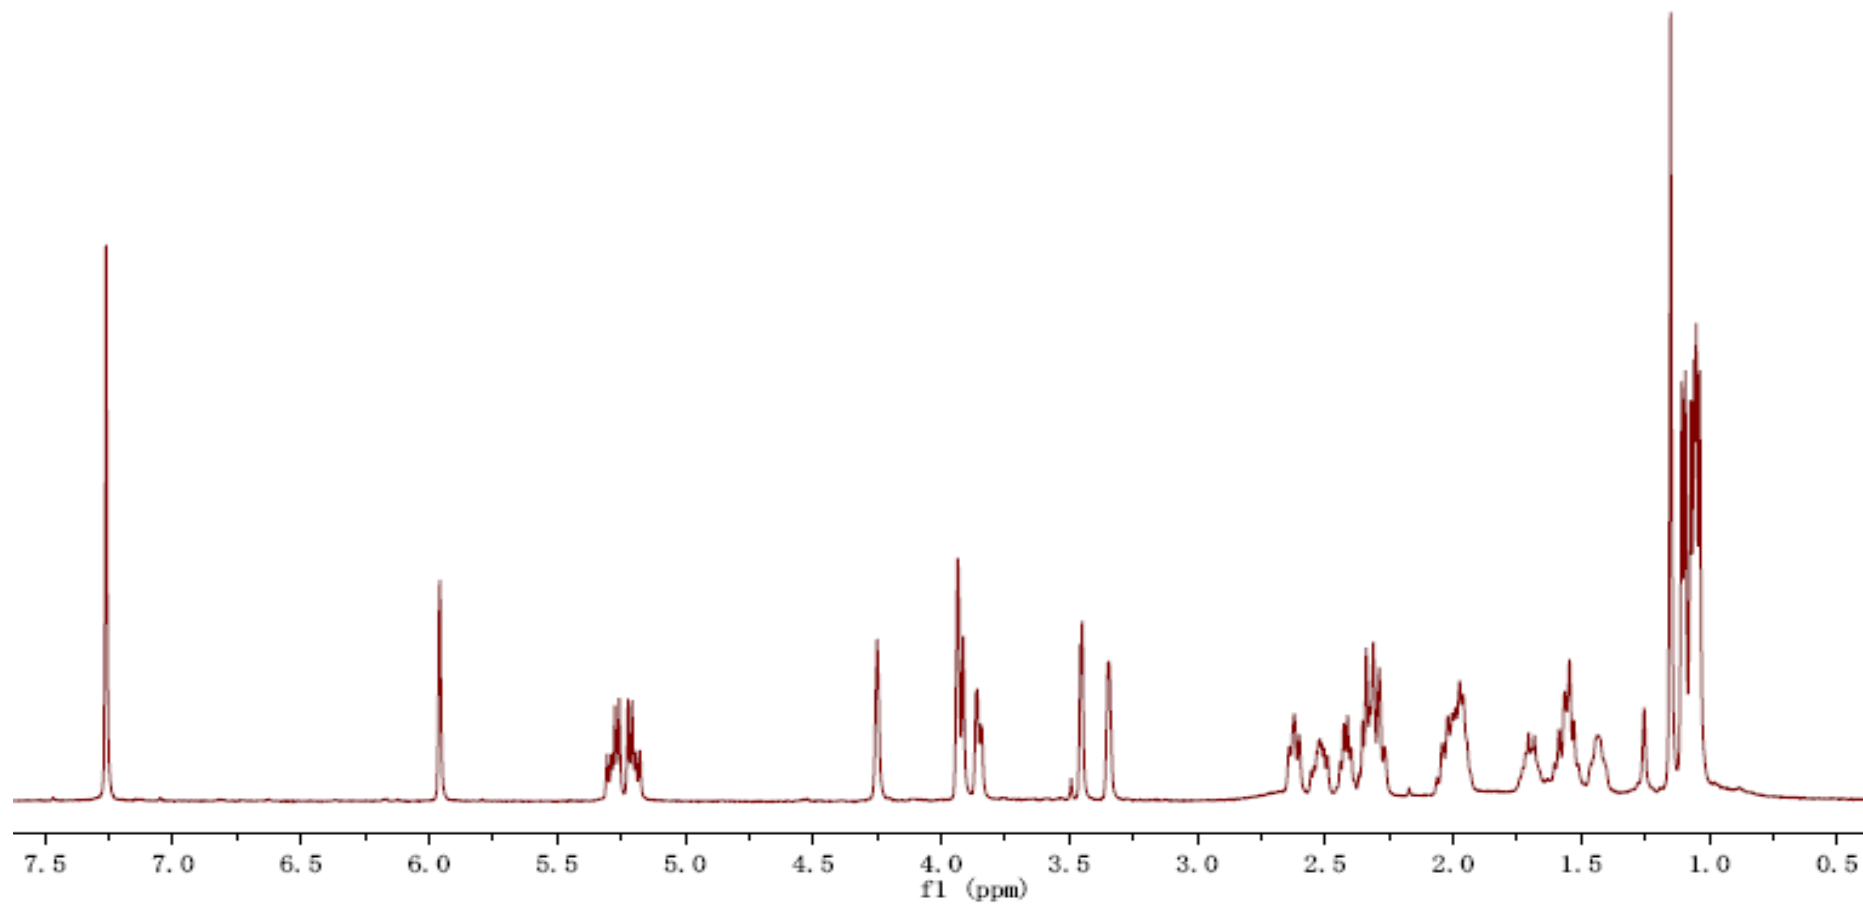

**Figure S2.**  $^{13}\text{C}$  NMR Spectrum of Sterolic Acid (**1**; 100 MHz,  $\text{CDCl}_3$ )

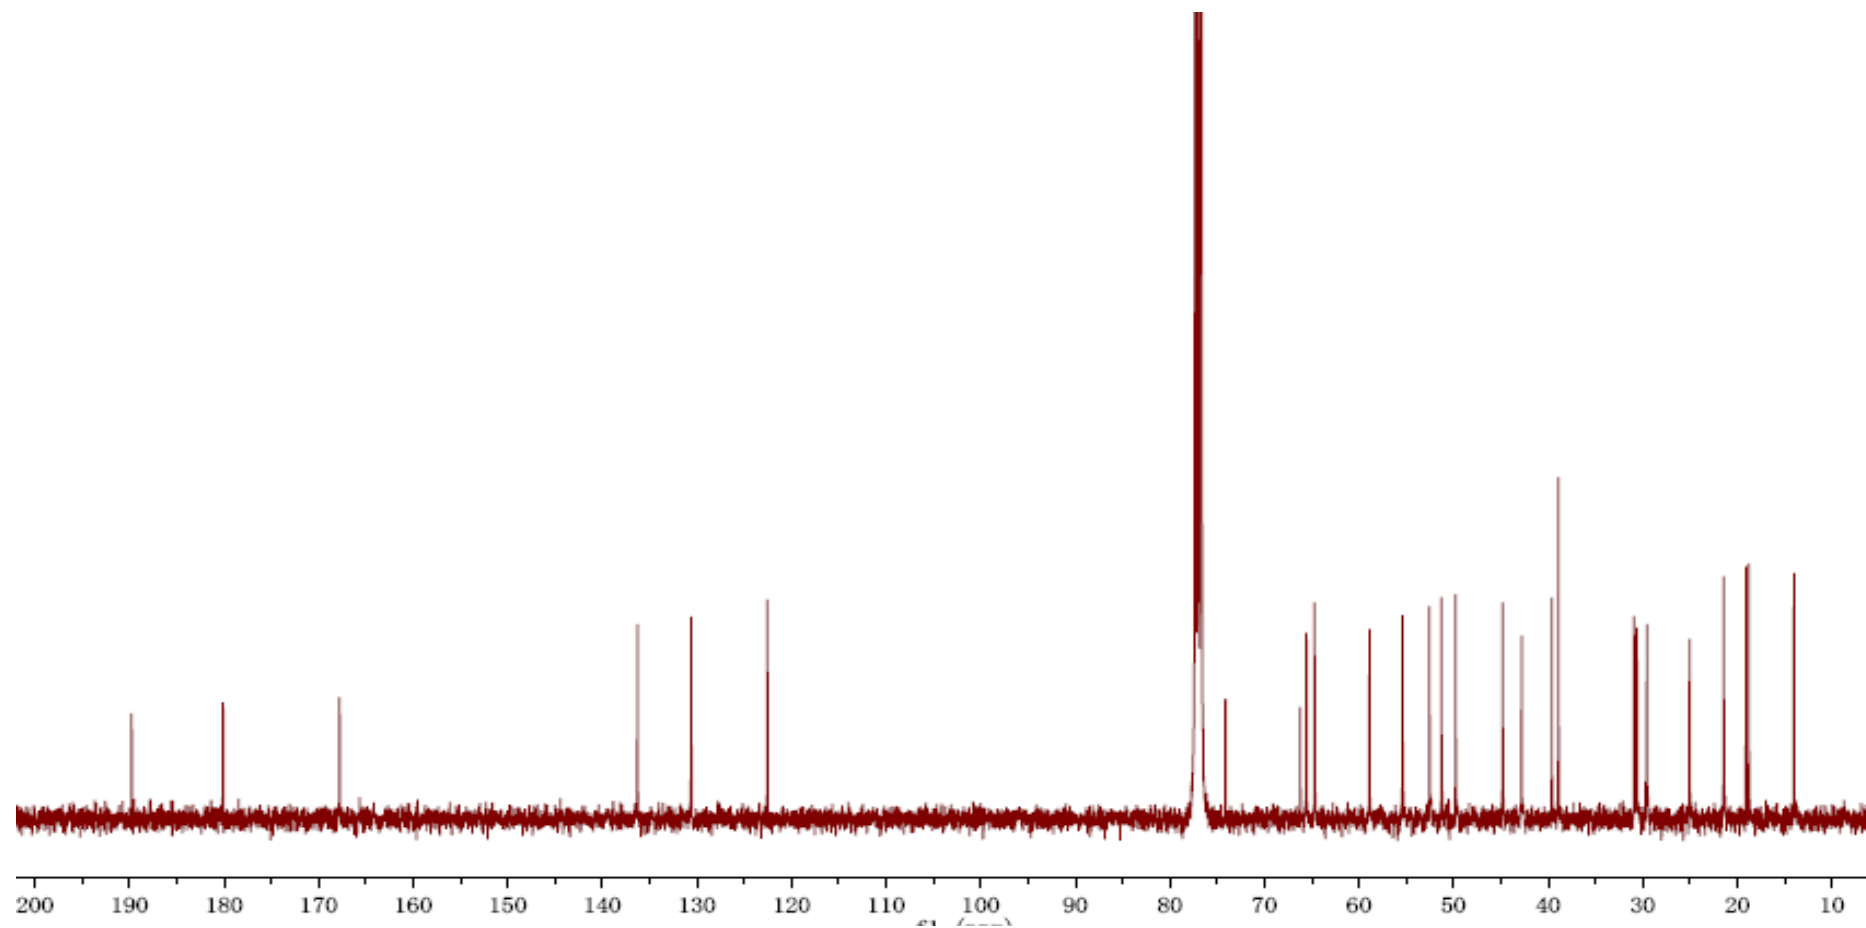

**Figure S3.**  $^1\text{H}$  NMR Spectrum of Brevione I (**2**; 500 MHz, Acetone- $d_6$ )

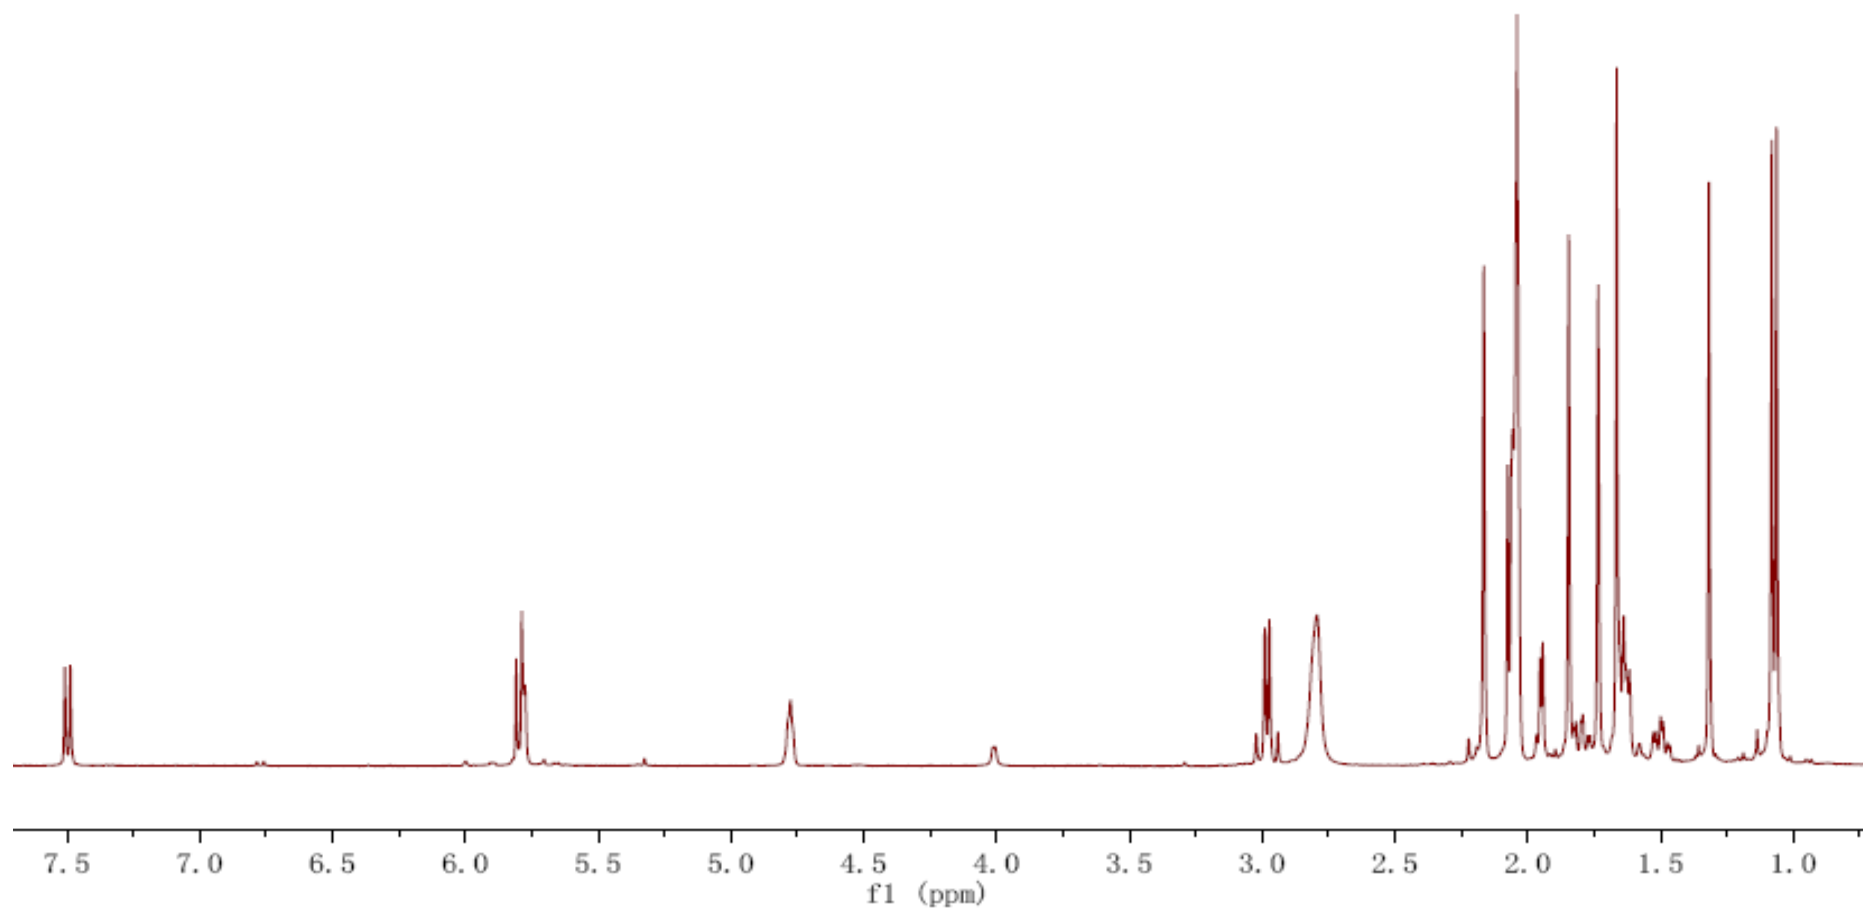

**Figure S4.**  $^{13}\text{C}$  NMR Spectrum of Brevione I (**2**; 100 MHz, Acetone- $d_6$ )

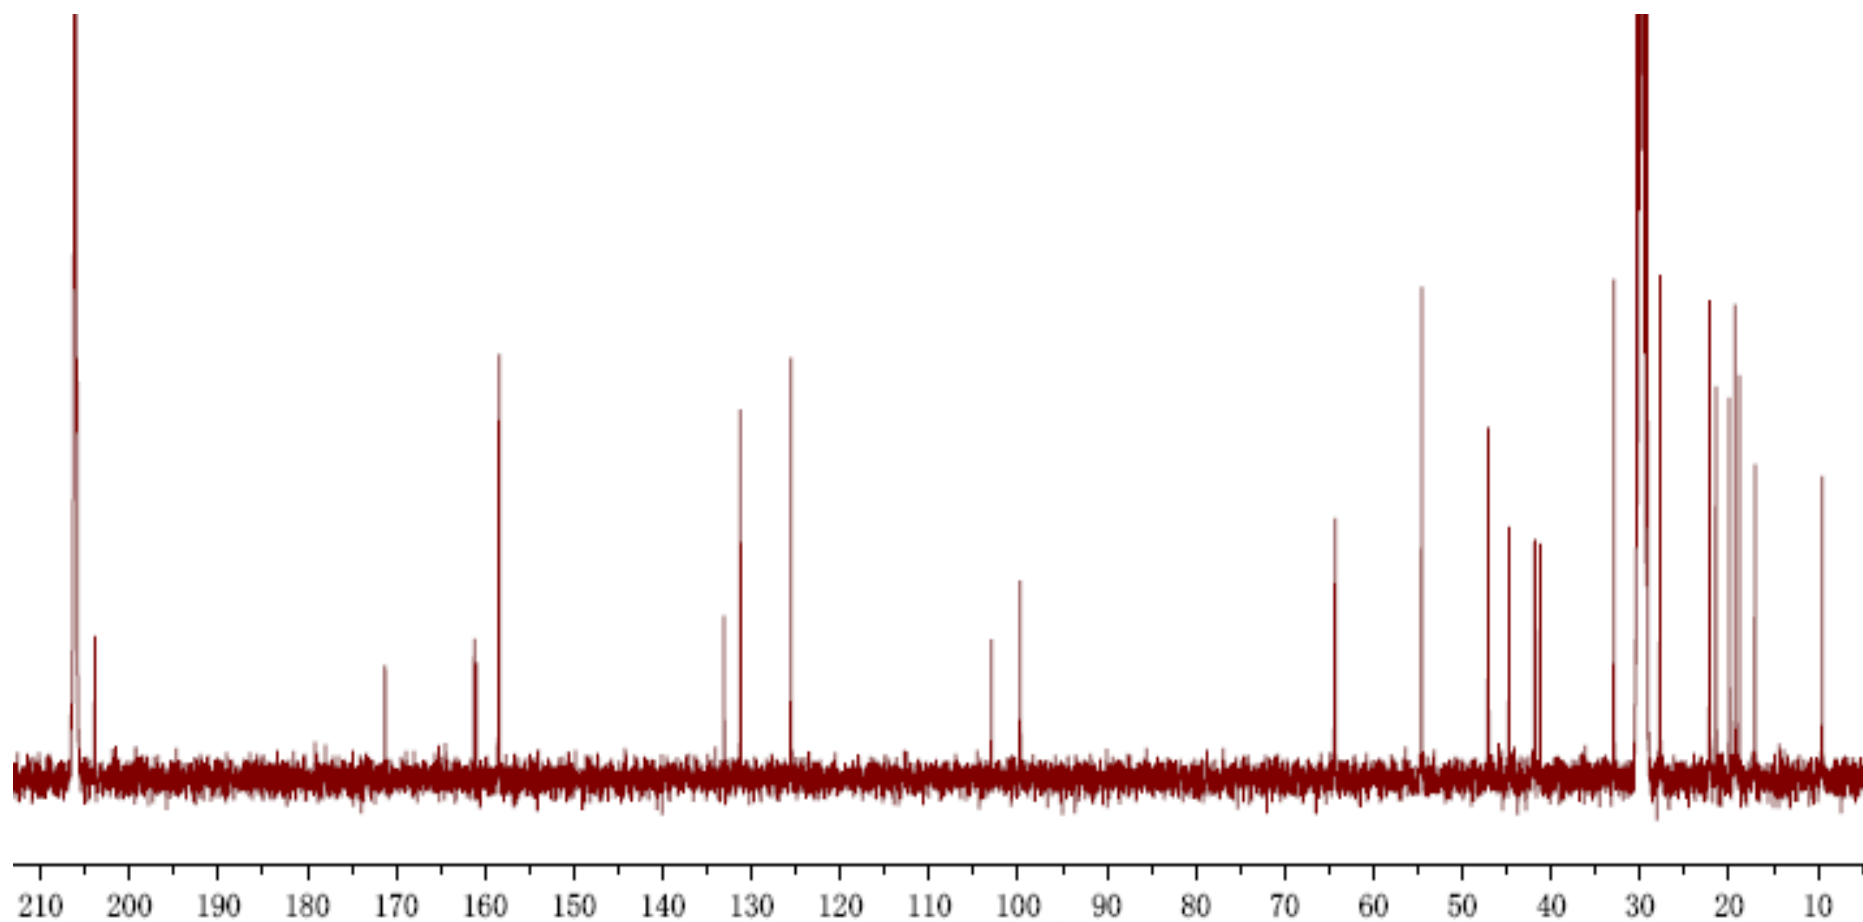

**Figure S5.** NOESY Spectrum of Brevione I (**2**; 600 MHz, Acetone- $d_6$ )

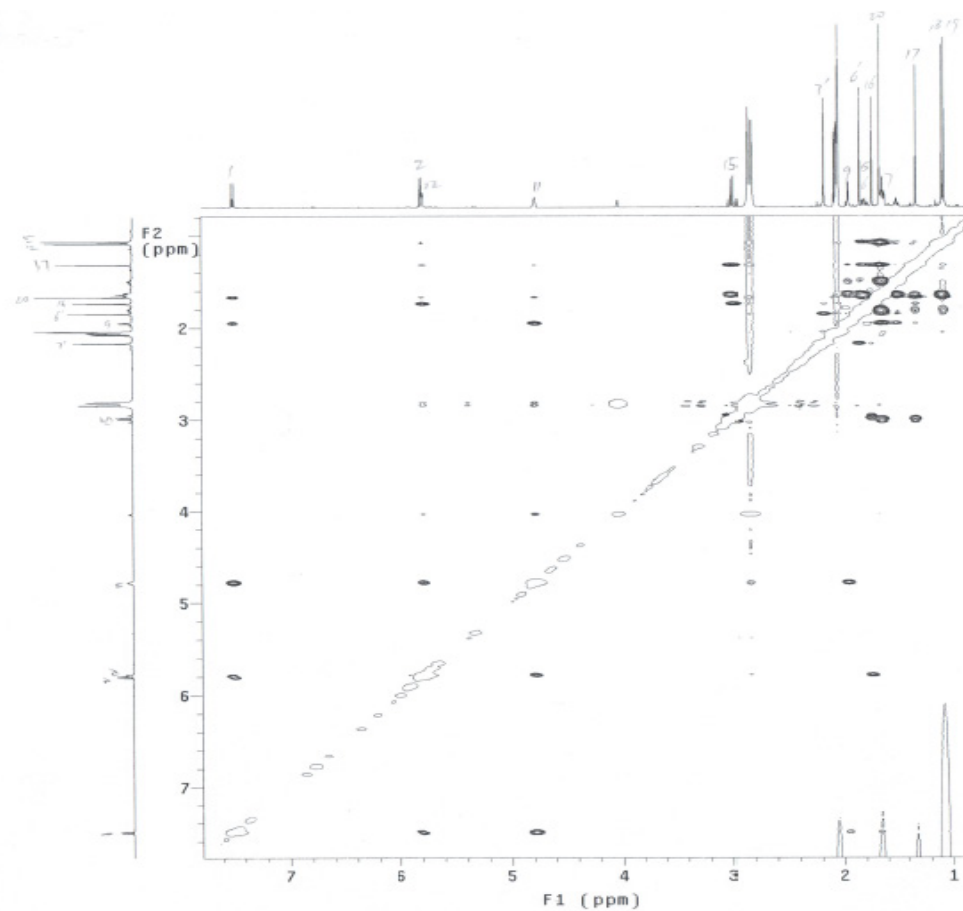

**Figure S6.**  $^1\text{H}$  NMR Spectrum of Brevione J (**3**; 500 MHz, Acetone- $d_6$ )

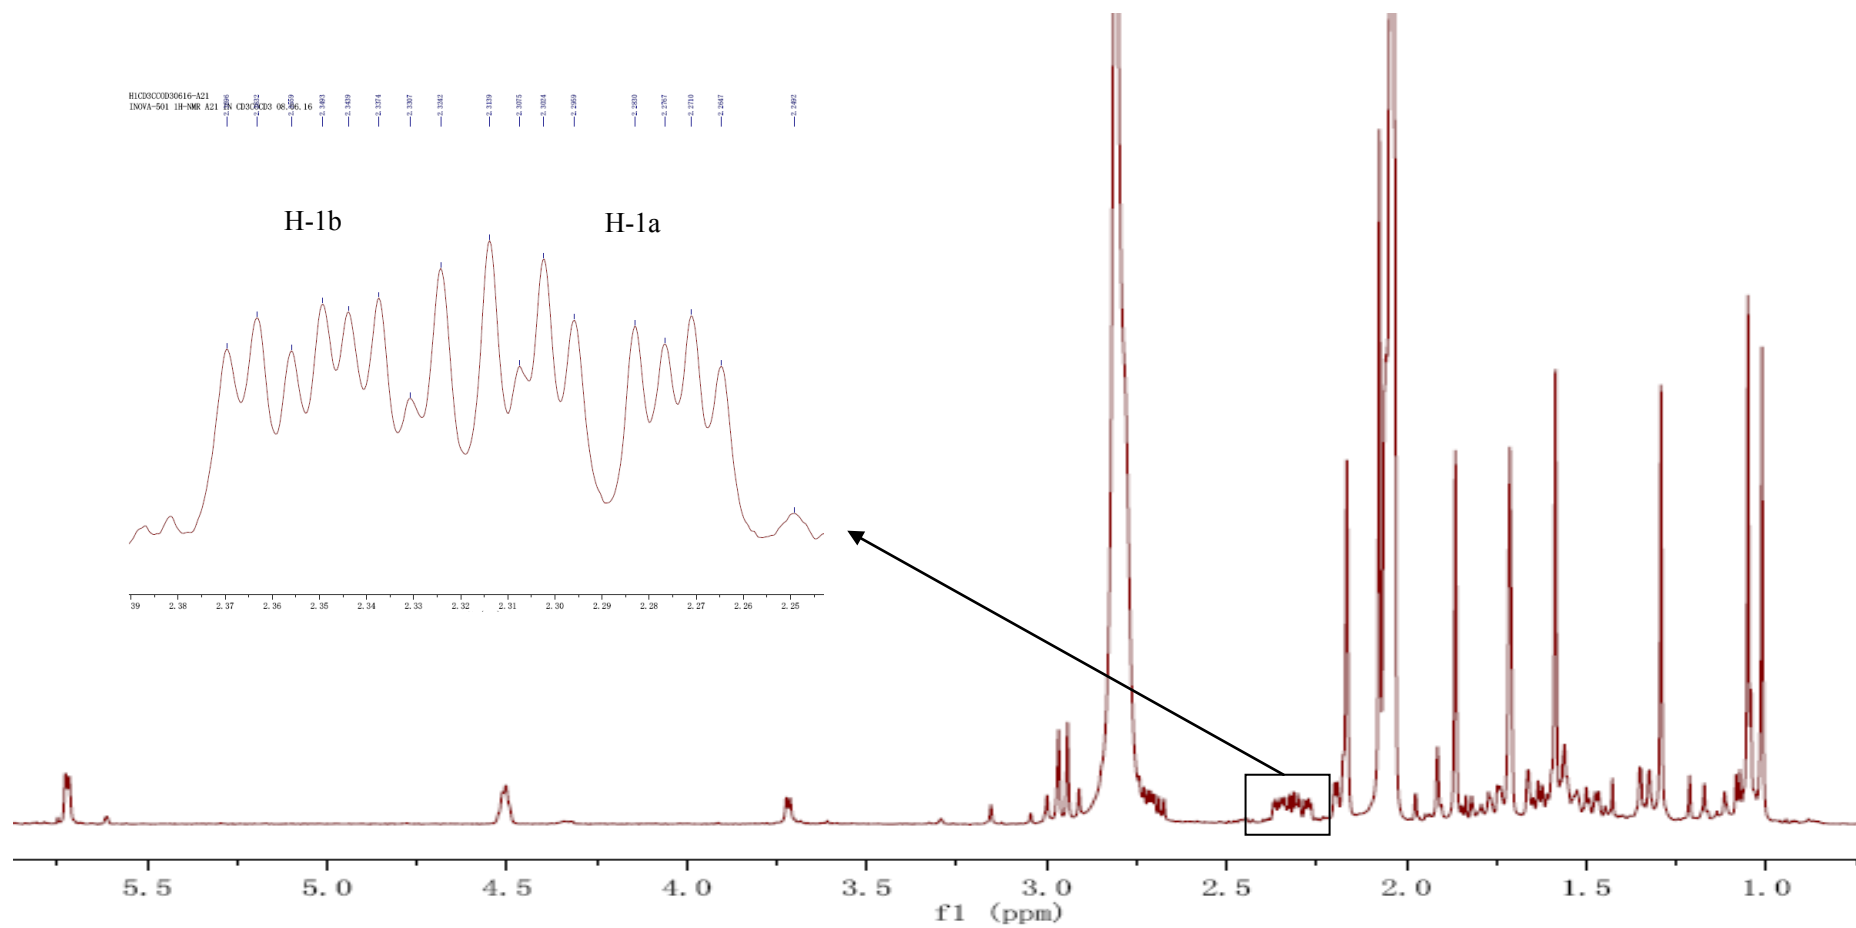

**Figure S7.**  $^{13}\text{C}$  NMR Spectrum of Brevione J (**3**; 100 MHz, Acetone- $d_6$ )

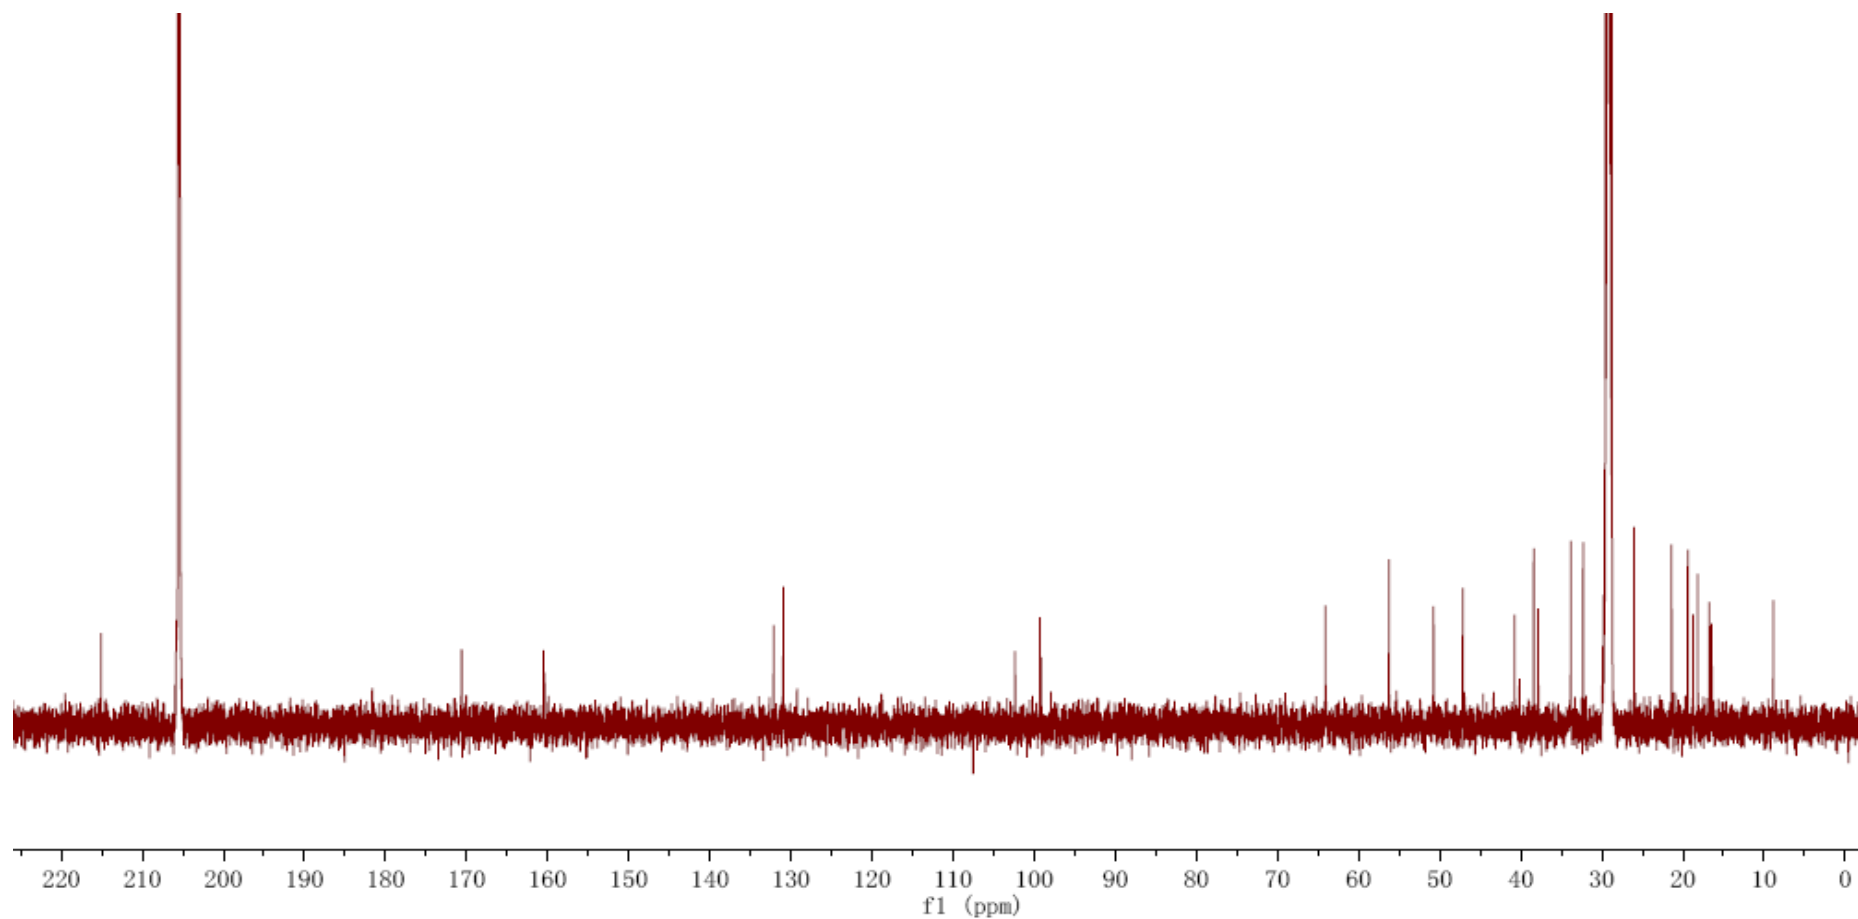



**Figure S8.** NOESY Spectrum of Brevione J (**3**; 600 MHz, Acetone- $d_6$ )

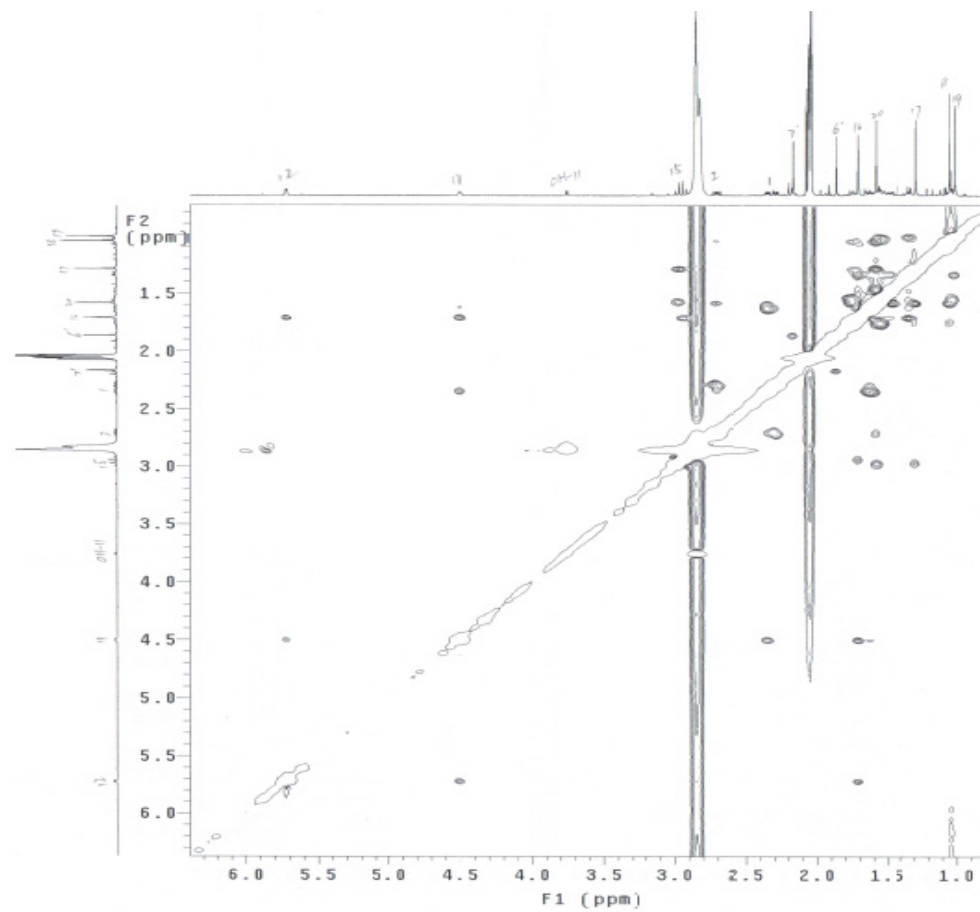

**Figure S9.**  $^1\text{H}$  NMR Spectrum of Brevione K (**4**; 500 MHz, Acetone- $d_6$ )

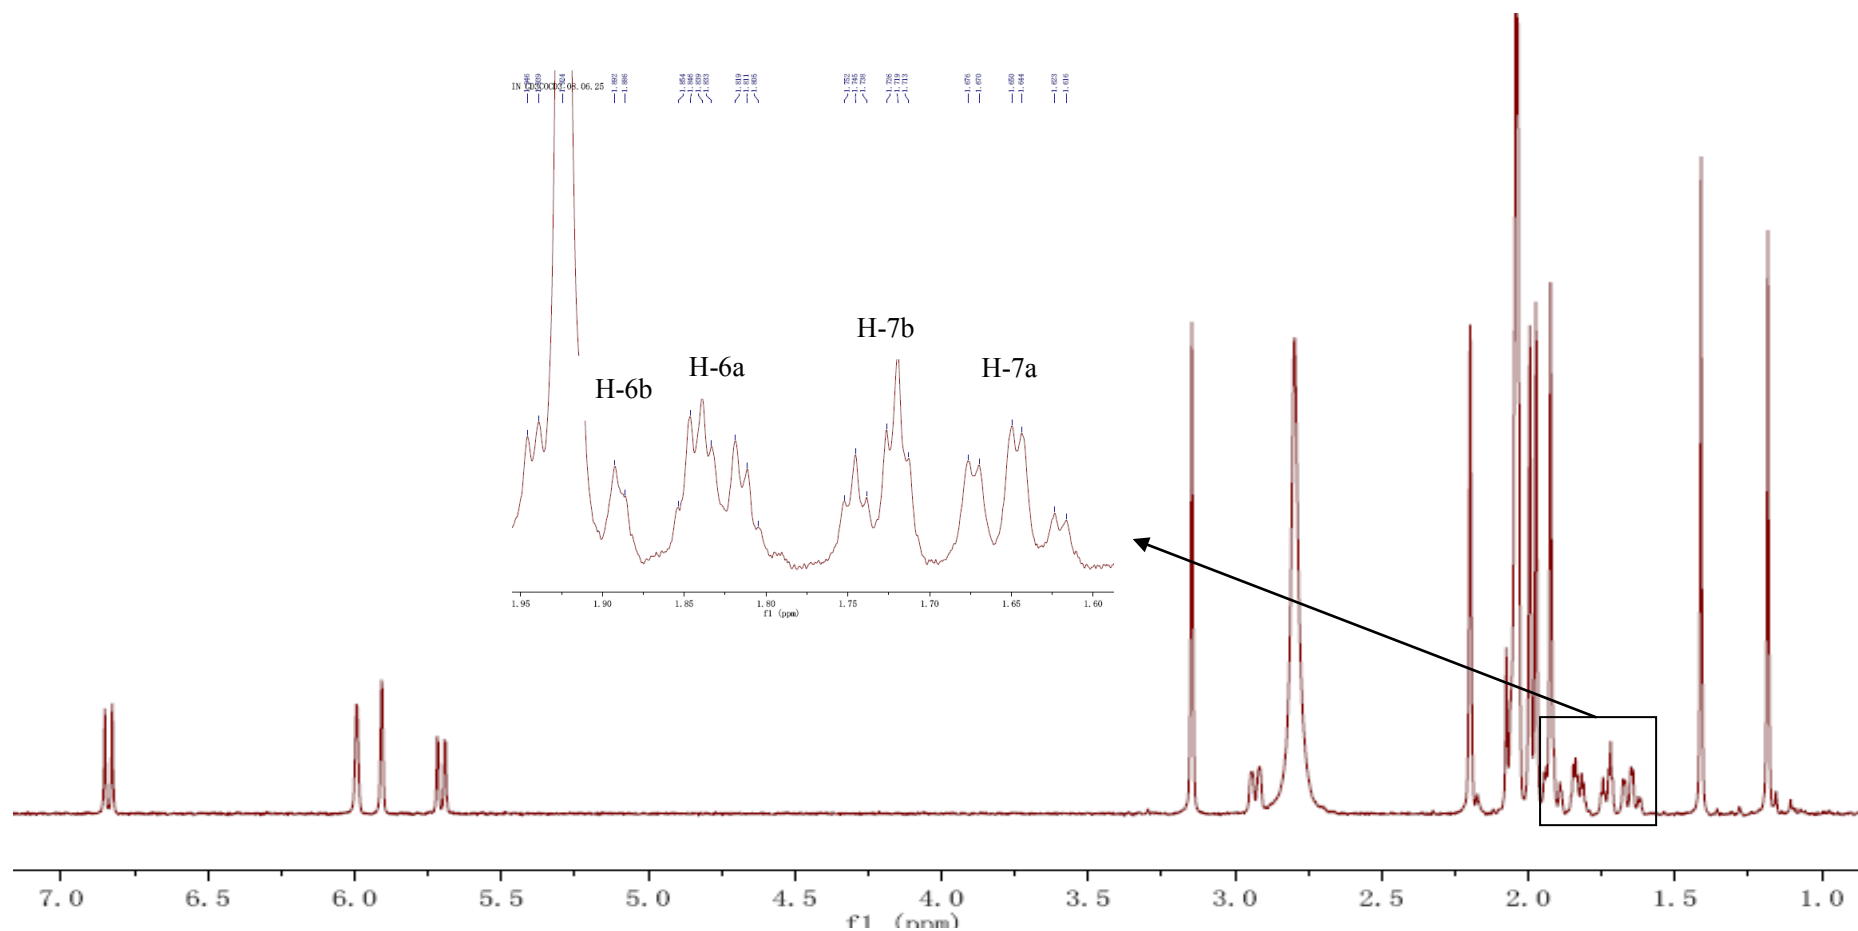

**Figure S10.**  $^{13}\text{C}$  NMR Spectrum of Brevione K (**4**; 150 MHz, Acetone- $d_6$ )

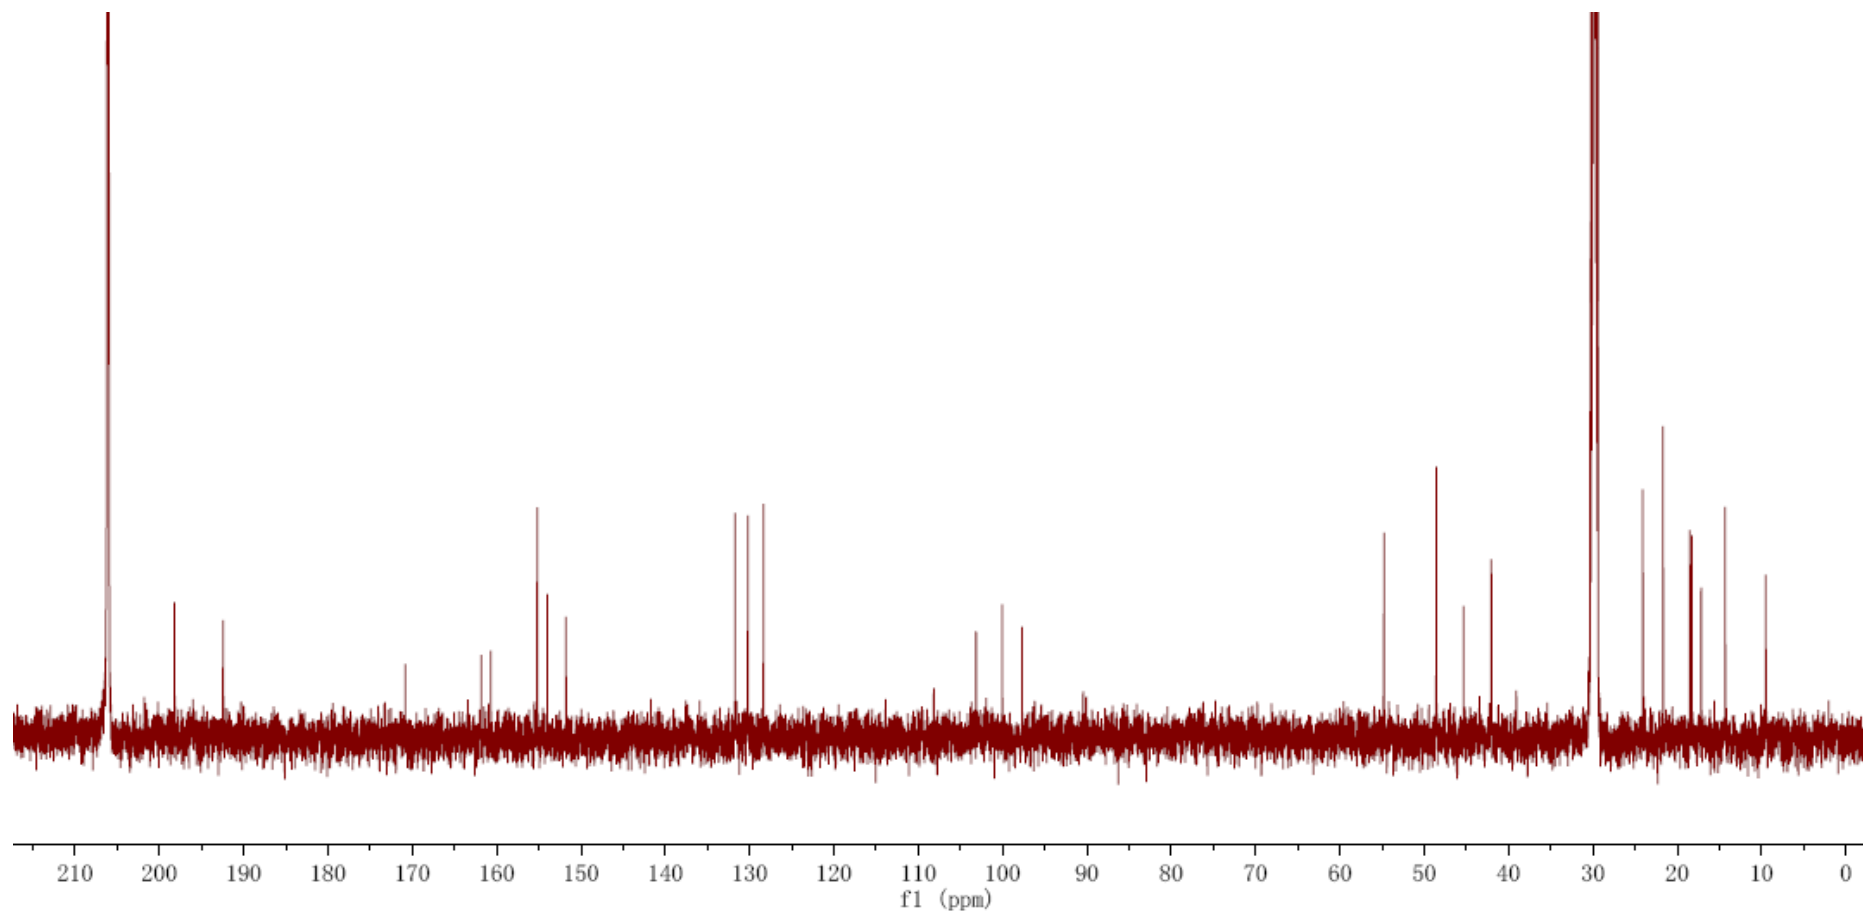

**Figure S11.** NOESY Spectrum of Brevione K (**4**; 600 MHz, Acetone- $d_6$ )

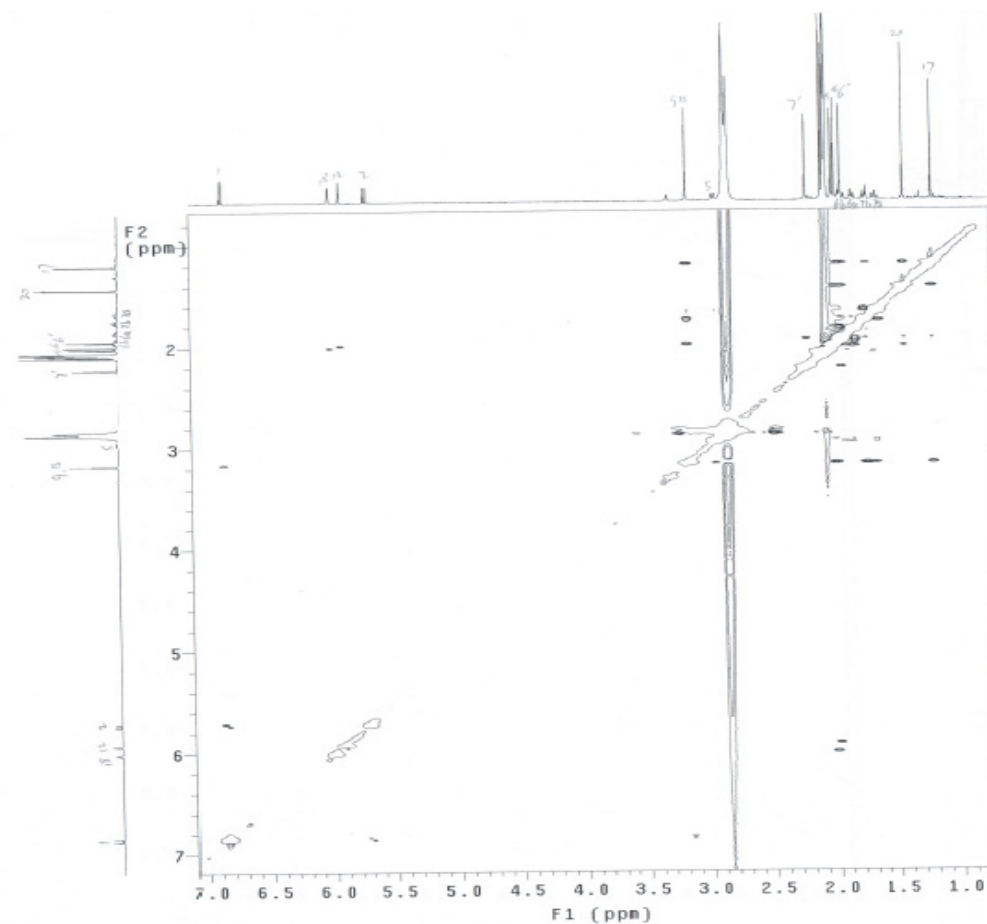

Supplement: s1 [file s1]
